# Supplementary material for: Low Five-Minute Apgar Score and Neurological Morbidities: Does Prematurity Modify the Association?
Source: MDPI journal article supplement (doi:10.3390/jcm11071922), 2022-03-30
Supplement: s1 [file s1]

**Table S1.** Neurological diagnoses and ICD-9 codes.

| Diagnosis Code | Diagnosis                                                         | Sub Category          |
|----------------|-------------------------------------------------------------------|-----------------------|
| 32727          | Central sleep apnea in conditions classified elsewhere            | sleep disorders       |
| 78051          | Insomnia with sleep apnea                                         | sleep disorders       |
| 78051          | Insomnia with sleep apnea, unspecified                            | sleep disorders       |
| 2990           | Autistic disorder                                                 | autism pdd            |
| 2990           | Infantile autism                                                  | autism pdd            |
| 2998           | Other specified pervasive developmental disorders                 | autism pdd            |
| 29900          | Autistic disorder, current or active state                        | autism pdd            |
| 29901          | Autistic disorder, residual state                                 | autism pdd            |
| 29910          | Childhood disintegrative disorder, current or active state        | autism pdd            |
| 29981          | Other specified pervasive developmental disorders, residual state | autism pdd            |
| 29990          | Unspecif.pervasive developmental disorder,current or active state | autism pdd            |
| 3071           | Anorexia nervosa                                                  | eating disorders      |
| 3075           | Other and unspecified disorders of eating                         | eating disorders      |
| 30750          | Eating disorder, unspecified                                      | eating disorders      |
| 30751          | Bulimia nervosa                                                   | eating disorders      |
| 30753          | Rumination disorder                                               | eating disorders      |
| 30759          | Other disorders of eating                                         | eating disorders      |
| V691           | Inappropriate diet & eating habits                                | eating disorders      |
| 3073           | Stereotypic movement disorder                                     | sleep disorders       |
| 7805           | Sleep disturbances                                                | sleep disorders       |
| 30746          | Sleep arousal disorder                                            | sleep disorders       |
| 30746          | Somnambulism or night terrors                                     | sleep disorders       |
| 30747          | Other dysfunctions of sleep stages or arousal from sleep          | sleep disorders       |
| 32730          | Circadian rhythm sleep disorder, unspecified                      | sleep disorders       |
| 32732          | Circadian rhythm sleep disorder, advanced sleep phase type        | sleep disorders       |
| 34700          | Narcolepsy without cataplexy                                      | sleep disorders       |
| 34701          | Narcolepsy with cataplexy                                         | sleep disorders       |
| 78050          | Unspecified sleep disturbance                                     | sleep disorders       |
| 78052          | Insomnia, unspecified                                             | sleep disorders       |
| 78052          | Other insomnia                                                    | sleep disorders       |
| 78054          | Hypersomnia, unspecified                                          | sleep disorders       |
| 78056          | Dysfunctions associated with sleep stages or arousal from sleep   | sleep disorders       |
| 78059          | Other sleep disturbances                                          | sleep disorders       |
| V694           | Lack of adequate sleep                                            | sleep disorders       |
| 3331           | Essential and other specified forms of tremor                     | movement dis/epilepsy |
| 3332           | Myoclonus                                                         | movement dis/epilepsy |
| 3335           | Other choreas                                                     | movement dis/epilepsy |
| 3336           | Genetic torsion dystonia                                          | movement dis/epilepsy |
| 3336           | Idiopathic torsion dystonia                                       | movement dis/epilepsy |
| 3343           | Other cerebellar ataxia                                           | movement dis/epilepsy |

|       |                                                                                   |                       |
|-------|-----------------------------------------------------------------------------------|-----------------------|
| 3450  | Generalized nonconvulsive epilepsy                                                | movement dis/epilepsy |
| 3452  | Petit mal status, epileptic                                                       | movement dis/epilepsy |
| 3453  | Grand mal status, epileptic                                                       | movement dis/epilepsy |
| 3455  | Partial epilepsy, without impairment of consciousness                             | movement dis/epilepsy |
| 3456  | Infantile spasms                                                                  | movement dis/epilepsy |
| 3459  | Epilepsy, unspecified                                                             | movement dis/epilepsy |
| 7810  | Abnormal involuntary movements                                                    | movement dis/epilepsy |
| 7812  | Abnormality of gait                                                               | movement dis/epilepsy |
| 7813  | Lack of coordination                                                              | movement dis/epilepsy |
| 33390 | Unsp.extrapyramidal disease + abnormal movement disorder                          | movement dis/epilepsy |
| 33399 | Other extrapyramidal diseases and abnormal movement disorders                     | movement dis/epilepsy |
| 34500 | Generalized nonconvulsive epilepsy without intractable epilepsy                   | movement dis/epilepsy |
| 34501 | Generalized nonconvulsive epilepsy with intractable epilepsy                      | movement dis/epilepsy |
| 34510 | Generalized convulsive epilepsy without intractable epilepsy                      | movement dis/epilepsy |
| 34511 | Generalized convulsive epilepsy with intractable epilepsy                         | movement dis/epilepsy |
| 34540 | Partial epilepsy+impairment of consciousness without intractable epilepsy         | movement dis/epilepsy |
| 34550 | Partial epilepsy without impairment of consciousness without intractable epilepsy | movement dis/epilepsy |
| 34560 | Infantile spasms without intractable epilepsy                                     | movement dis/epilepsy |
| 34590 | Epilepsy, unsp. Without intractable epilepsy                                      | movement dis/epilepsy |
| 34590 | Epilepsy, unsp. Without intractable epilepsy                                      | movement dis/epilepsy |
| 34591 | Epilepsy unsp. With intractable epilepsy                                          | movement dis/epilepsy |
| 78031 | Febrile convulsions                                                               | movement dis/epilepsy |
| 78031 | Febrile convulsions (simple), unspecified                                         | movement dis/epilepsy |
| 78032 | Complex febrile convulsions                                                       | movement dis/epilepsy |
| 78039 | Other convulsions                                                                 | movement dis/epilepsy |
| 78099 | Other general symptoms                                                            | movement dis/epilepsy |
| 3341  | Hereditary spastic paraplegia                                                     | cp, plegia, palsy     |
| 3421  | Spastic hemiplegia                                                                | cp, plegia, palsy     |
| 3429  | Hemiplegia, unspecified                                                           | cp, plegia, palsy     |
| 3430  | Congenital diplegia                                                               | cp, plegia, palsy     |
| 3431  | Congenital hemiplegia                                                             | cp, plegia, palsy     |

|       |                                                                    |                       |
|-------|--------------------------------------------------------------------|-----------------------|
| 3432  | Congenital quadriplegia                                            | cp, plegia, palsy     |
| 3439  | Infantile cerebral palsy, unspecified                              | cp, plegia, palsy     |
| 3441  | Paraplegia                                                         | cp, plegia, palsy     |
| 3442  | Diplegia of upper limbs                                            | cp, plegia, palsy     |
| 3449  | Paralysis, unspecified                                             | cp, plegia, palsy     |
| 3481  | Anoxic brain damage                                                | cp, plegia, palsy     |
| 3526  | Multiple cranial nerve palsies                                     | cp, plegia, palsy     |
| 7814  | Transient paralysis of limb                                        | cp, plegia, palsy     |
| 34210 | Spastic hemiplegia affecting unsp. Side                            | cp, plegia, palsy     |
| 34290 | Hemiplegia, unsp., affecting unsp. Side                            | cp, plegia, palsy     |
| 34291 | Hemiplegia, unsp., affecting dominant side                         | cp, plegia, palsy     |
| 34292 | Hemiplegia, unsp., affecting nondominant side                      | cp, plegia, palsy     |
| 34400 | Quadriplegia, unspecified                                          | cp, plegia, palsy     |
| 34430 | Monoplegia of lower limb, affecting unsp. Side                     | cp, plegia, palsy     |
| 34440 | Monoplegia of upper limb, affecting unsp. Side                     | cp, plegia, palsy     |
| 34489 | Other specified paralytic syndrome                                 | cp, plegia, palsy     |
| 43811 | Aphasia                                                            | cp, plegia, palsy     |
| 43820 | Hemiplegia affecting unsp. Side                                    | cp, plegia, palsy     |
| 309   | Adjustment reaction                                                | psychiatric emotional |
| 311   | Depressive disorder, not elsewhere classified                      | psychiatric emotional |
| 316   | Psychic factors associated with diseases classified elsewhere      | psychiatric emotional |
| 2930  | Acute delirium                                                     | psychiatric emotional |
| 2930  | Delirium due to conditions classified elsewhere                    | psychiatric emotional |
| 2940  | Amnesic disorder in conditions classified elsewhere                | psychiatric emotional |
| 2949  | Unspecified persistent mental disorders due to cond.class.elsewh.  | psychiatric emotional |
| 2971  | Delusional disorder                                                | psychiatric emotional |
| 2979  | Unspecified paranoid state                                         | psychiatric emotional |
| 2981  | Excitatory type psychosis                                          | psychiatric emotional |
| 2983  | Acute paranoid reaction                                            | psychiatric emotional |
| 2989  | Unspecified psychosis                                              | psychiatric emotional |
| 3003  | Obsessive-compulsive disorders                                     | psychiatric emotional |
| 3004  | Dysthymic disorder                                                 | psychiatric emotional |
| 3004  | Neurotic depression                                                | psychiatric emotional |
| 3009  | Unspecified nonpsychotic mental disorder                           | psychiatric emotional |
| 3019  | Unspecified personality disorder                                   | psychiatric emotional |
| 3026  | Disorders of psychosexual identity                                 | psychiatric emotional |
| 3051  | Tobacco use disorder (tobacco dependence)                          | psychiatric emotional |
| 3061  | Respiratory malfunction arising from mental factors                | psychiatric emotional |
| 3062  | Cardiovascular malfunction arising from mental factors             | psychiatric emotional |
| 3068  | Other specified psychophysiological malfunction                    | psychiatric emotional |
| 3069  | Unspecified psychophysiological malfunction                        | psychiatric emotional |
| 3070  | Adult onset fluency disorder                                       | psychiatric emotional |
| 3070  | Stammering and stuttering                                          | psychiatric emotional |
| 3070  | Stuttering                                                         | psychiatric emotional |
| 3080  | Predominant disturbance of emotions                                | psychiatric emotional |
| 3089  | Unspecified acute reaction to stress                               | psychiatric emotional |
| 3090  | Adjustment disorder with depressed mood                            | psychiatric emotional |
| 3094  | Adjustment disorder with mixed disturbance of emotions and conduct | psychiatric emotional |
| 3099  | Unspecified adjustment reaction                                    | psychiatric emotional |
| 3129  | Unspecified disturbance of conduct                                 | psychiatric emotional |

|       |                                                                   |                       |
|-------|-------------------------------------------------------------------|-----------------------|
| 3139  | Unspecified emotional disturbance of childhood or adolescence     | psychiatric emotional |
| 7801  | Hallucinations                                                    | psychiatric emotional |
| 7803  | Convulsions                                                       | psychiatric emotional |
| 7992  | Nervousness                                                       | psychiatric emotional |
| 7993  | Debility, unspecified                                             | psychiatric emotional |
| 29384 | Anxiety disorder in conditions classified elsewhere               | psychiatric emotional |
| 29530 | Paranoid type schizophrenia, unspecified state                    | psychiatric emotional |
| 29570 | Schizoaffective disorder schizophrenia, unspecified state         | psychiatric emotional |
| 29580 | Other specified types of schizophrenia, unspecified state         | psychiatric emotional |
| 29590 | Unspecified type schizophrenia, unspecified state                 | psychiatric emotional |
| 29600 | Bipolar i disorder, single manic episode, unspecified degree      | psychiatric emotional |
| 29620 | Major depressive affective disorder, single episode, unsp. degree | psychiatric emotional |
| 29680 | Bipolar disorder, unspecified                                     | psychiatric emotional |
| 29690 | Unspecified episodic mood disorder                                | psychiatric emotional |
| 29699 | Other specified affective psychoses                               | psychiatric emotional |
| 30000 | Anxiety state, unspecified                                        | psychiatric emotional |
| 30001 | Panic disorder without agoraphobia                                | psychiatric emotional |
| 30009 | Other anxiety states                                              | psychiatric emotional |
| 30010 | Hysteria, unspecified                                             | psychiatric emotional |
| 30011 | Conversion disorder                                               | psychiatric emotional |
| 30029 | Other isolated or simple phobias                                  | psychiatric emotional |
| 30183 | Borderline personality                                            | psychiatric emotional |
| 30183 | Borderline personality disorder                                   | psychiatric emotional |
| 30302 | Ac.alcoholic intoxic.in alcoholism,episodic drinking behavior     | psychiatric emotional |
| 30400 | Opioid type dependence, unspecified use                           | psychiatric emotional |
| 30430 | Cannabis dependence, unspecified use                              | psychiatric emotional |
| 30432 | Cannabis dependence, episodic use                                 | psychiatric emotional |
| 30500 | Alcohol abuse, unspecified drinking behavior                      | psychiatric emotional |
| 30501 | Alcohol abuse, continuous drinking behavior                       | psychiatric emotional |
| 30502 | Alcohol abuse, episodic drinking behavior                         | psychiatric emotional |
| 30591 | Other, mixed, or unspecified drug abuse, continuous use           | psychiatric emotional |
| 30720 | Tic disorder, unspecified                                         | psychiatric emotional |
| 30722 | Chronic motor or vocal tic disorder                               | psychiatric emotional |
| 30723 | Tourette's disorder                                               | psychiatric emotional |
| 30752 | Pica                                                              | psychiatric emotional |
| 30924 | Adjustment disorder with anxiety                                  | psychiatric emotional |
| 30981 | Posttraumatic stress disorder                                     | psychiatric emotional |
| 31210 | Undersocialized conduct disorder,unaggressive type,unspecified    | psychiatric emotional |
| 31239 | Other disorders of impulse control                                | psychiatric emotional |
| 31389 | Other emotional disturbances of childhood or adolescence          | psychiatric emotional |
| 79921 | Nervousness                                                       | psychiatric emotional |
| 79922 | Irritability                                                      | psychiatric emotional |
| 79925 | Demoralization and apathy                                         | psychiatric emotional |
| 79929 | Other signs and symptoms involving emotional state                | psychiatric emotional |
| V6284 | Suicidal ideation                                                 | psychiatric emotional |
| 3142  | Hyperkinetic conduct disorder of childhood                        | adhd                  |
| 3149  | Unspecified hyperkinetic syndrome of childhood                    | adhd                  |

|       |                                                                |                             |
|-------|----------------------------------------------------------------|-----------------------------|
| 31400 | Attention deficit disorder without hyperactivity               | adhd                        |
| 31401 | Attention deficit disorder with hyperactivity                  | adhd                        |
| V400  | Mental and behavioral problems with learning                   | adhd                        |
| V409  | Unspecified mental or behavioral problem                       | adhd                        |
| 317   | Mild intellectual disabilities                                 | developmental dis           |
| 317   | Mild mental retardation                                        | developmental dis           |
| 319   | Unspecified intellectual disabilities                          | developmental dis           |
| 319   | Unspecified mental retardation                                 | developmental dis           |
| 3152  | Other specific developmental learning difficulties             | developmental dis           |
| 3154  | Developmental coordination disorder                            | developmental dis           |
| 3158  | Other specified delays in development                          | developmental dis           |
| 3159  | Unspecified delay in development                               | developmental dis           |
| 7834  | Lack of expected normal physiological development              | developmental dis           |
| 7834  | Lack of expected normal physiological development in childhood | developmental dis           |
| 31531 | Expressive language disorder                                   | developmental dis           |
| 31534 | Speech and language developmental delay due to hearing loss    | developmental dis           |
| 31539 | Other developmental speech disorder                            | developmental dis           |
| 33183 | Mild cognitive impairment, so stated                           | developmental dis           |
| 78340 | Lack of normal physiological development, unspecified          | developmental dis           |
| 330   | Cerebral degenerations usually manifest in childhood           | degenerative, demyelisation |
| 335   | Anterior horn cell disease                                     | degenerative, demyelisation |
| 340   | Multiple sclerosis                                             | degenerative, demyelisation |
| 3300  | Leukodystrophy                                                 | degenerative, demyelisation |
| 3308  | Other specified cerebral degenerations in childhood            | degenerative, demyelisation |
| 3313  | Communicating hydrocephalus                                    | degenerative, demyelisation |
| 3314  | Obstructive hydrocephalus                                      | degenerative, demyelisation |
| 3319  | Cerebral degeneration, unspecified                             | degenerative, demyelisation |
| 3348  | Other spinocerebellar diseases                                 | degenerative, demyelisation |
| 3350  | Werdnig-hoffmann disease                                       | degenerative, demyelisation |
| 3360  | Syringomyelia and syringobulbia                                | degenerative, demyelisation |
| 3410  | Neuromyelitis optica                                           | degenerative, demyelisation |
| 3411  | Schilder's disease                                             | degenerative, demyelisation |
| 3419  | Demyelinating disease of central nervous system, unspecified   | degenerative, demyelisation |
| 3480  | Cerebral cysts                                                 | degenerative, demyelisation |
| 3590  | Congenital hereditary muscular dystrophy                       | degenerative, demyelisation |
| 3591  | Hereditary progressive muscular dystrophy                      | degenerative, demyelisation |

|        |                                                                                                              |                             |
|--------|--------------------------------------------------------------------------------------------------------------|-----------------------------|
| 33189  | Other cerebral degeneration                                                                                  | degenerative, demyelisation |
| 33510  | Spinal muscular atrophy, unspecified                                                                         | degenerative, demyelisation |
| 33522  | Progressive bulbar palsy                                                                                     | degenerative, demyelisation |
| 33523  | Pseudobulbar palsy                                                                                           | degenerative, demyelisation |
| 34120  | Acute (transverse) myelitis nos                                                                              | degenerative, demyelisation |
| 348891 | Cerebral calcification                                                                                       | degenerative, demyelisation |
| 3313 2 | Post hemorrhagic hydrocephalus                                                                               | degenerative, demyelisation |
| 3469   | Migraine, unspecified                                                                                        | headache                    |
| 30781  | Tension headache                                                                                             | headache                    |
| 34600  | Migraine with aura without mention of intractable migraine, without mention of status migrainosus            | headache                    |
| 34601  | Migraine with aura, so stated, without mention of status migrainosus                                         | headache                    |
| 34620  | Variants of migraine, without intractable migraine                                                           | headache                    |
| 34630  | Hemiplegic migraine without mention of intractable migraine, without mention of status migrainosus           | headache                    |
| 34670  | Chronic migraine without aura without mention of intractable migraine, without mention of status migrainosus | headache                    |
| 34690  | Migraine, unspecified, without intractable migraine                                                          | headache                    |
| 34690  | Migraine, unspecified, without mention of intractable migraine without mention of status migrainosus         | headache                    |
| 352    | Disorders of other cranial nerves                                                                            | myopathy                    |
| 3379   | Unspecified disorder of autonomic nervous system                                                             | myopathy                    |
| 3510   | Bell's palsy                                                                                                 | myopathy                    |
| 3518   | Other facial nerve disorders                                                                                 | myopathy                    |
| 3519   | Facial nerve disorder, unspecified                                                                           | myopathy                    |
| 3539   | Unspecified nerve root and plexus disorder                                                                   | myopathy                    |
| 3542   | Lesion of ulnar nerve                                                                                        | myopathy                    |
| 3548   | Other mononeuritis of upper limb                                                                             | myopathy                    |
| 3549   | Mononeuritis of upper limb, unspecified                                                                      | myopathy                    |
| 3553   | Lesion of lateral popliteal nerve                                                                            | myopathy                    |
| 3556   | Lesion of plantar nerve                                                                                      | myopathy                    |
| 3558   | Mononeuritis of lower limb, unspecified                                                                      | myopathy                    |
| 3559   | Mononeuritis of unspecified site                                                                             | myopathy                    |
| 3562   | Hereditary sensory neuropathy                                                                                | myopathy                    |
| 3564   | Idiopathic progressive polyneuropathy                                                                        | myopathy                    |
| 3568   | Other specified idiopathic peripheral neuropathy                                                             | myopathy                    |
| 3569   | Unspecified idiopathic peripheral neuropathy                                                                 | myopathy                    |
| 3570   | Acute infective polyneuritis                                                                                 | myopathy                    |
| 3571   | Polyneuropathy in collagen vascular disease                                                                  | myopathy                    |
| 3572   | Polyneuropathy in diabetes                                                                                   | myopathy                    |
| 3577   | Polyneuropathy due to other toxic agents                                                                     | myopathy                    |
| 3588   | Other specified myoneural disorders                                                                          | myopathy                    |
| 3589   | Myoneural disorders, unspecified                                                                             | myopathy                    |
| 3592   | Myotonic disorders                                                                                           | myopathy                    |
| 3599   | Myopathy, unspecified                                                                                        | myopathy                    |

|       |                                                  |                                   |
|-------|--------------------------------------------------|-----------------------------------|
| 33709 | Other idiopathic peripheral autonomic neuropathy | myopathy                          |
| 33720 | Reflex sympathetic dystrophy, unspecified        | myopathy                          |
| 33721 | Reflex sympathetic dystrophy of upper limb       | myopathy                          |
| 33722 | Reflex sympathetic dystrophy of lower limb       | myopathy                          |
| 35781 | Chronic inflammatory demyelinating polyneuritis  | myopathy                          |
| 35800 | Myasthenia gravis without (acute) exacerbation   | myopathy                          |
| 3383  | Neoplasm related pain (acute) (chronic)          | OTHER (including empty subgroups) |
| 3384  | Chronic pain syndrome                            | OTHER (including empty subgroups) |
| 3482  | Benign intracranial hypertension                 | OTHER (including empty subgroups) |
| 3483  | Encephalopathy, unspecified                      | OTHER (including empty subgroups) |
| 3483  | Encephalopathy, not elsewhere classified         | OTHER (including empty subgroups) |
| 3490  | Reaction to spinal or lumbar puncture            | OTHER (including empty subgroups) |
| 3492  | Disorders of meninges, not elsewhere classified  | OTHER (including empty subgroups) |
| 3499  | Unspecified disorders of nervous system          | OTHER (including empty subgroups) |
| 3561  | Peroneal muscular atrophy                        | OTHER (including empty subgroups) |
| 7802  | Syncope and collapse                             | OTHER (including empty subgroups) |
| 7843  | Aphasia                                          | OTHER (including empty subgroups) |
| 30789 | Other psychalgia                                 | OTHER (including empty subgroups) |
| 33381 | Blepharospasm                                    | OTHER (including empty subgroups) |
| 33819 | Other acute pain                                 | OTHER (including empty subgroups) |
| 33829 | Other chronic pain                               | OTHER (including empty subgroups) |
| 33903 | Episodic paroxysmal hemicrania                   | OTHER (including empty subgroups) |
| 34830 | Encephalopathy, unspecified                      | OTHER (including empty subgroups) |
| 34831 | Metabolic encephalopathy                         | OTHER (including empty subgroups) |
| 34881 | Temporal sclerosis                               | OTHER (including empty subgroups) |
| 34889 | Other conditions of brain                        | OTHER (including empty subgroups) |
| 34981 | Cerebrospinal fluid rhinorrhea                   | OTHER (including empty subgroups) |
| 34989 | Other specified disorders of nervous system      | OTHER (including empty subgroups) |
| 78093 | Memory loss                                      | OTHER (including empty subgroups) |
| 99701 | Central nervous system complication              | OTHER (including empty subgroups) |

|        |                                    |                                   |
|--------|------------------------------------|-----------------------------------|
| 99709  | Other nervous system complications | OTHER (including empty subgroups) |
| 3488 1 | Cerebral calcification             | OTHER (including empty subgroups) |
